# Supplementary material for: CIC-DUX4 Chromatin Profiling Reveals New Epigenetic Dependencies and Actionable Therapeutic Targets in CIC-Rearranged Sarcomas
Source: MDPI journal article supplement (doi:10.3390/cancers16020457), 2024-01-21
Supplement: s1 [file s1]

## Supplementary Figures 1-3

**Figure S1**

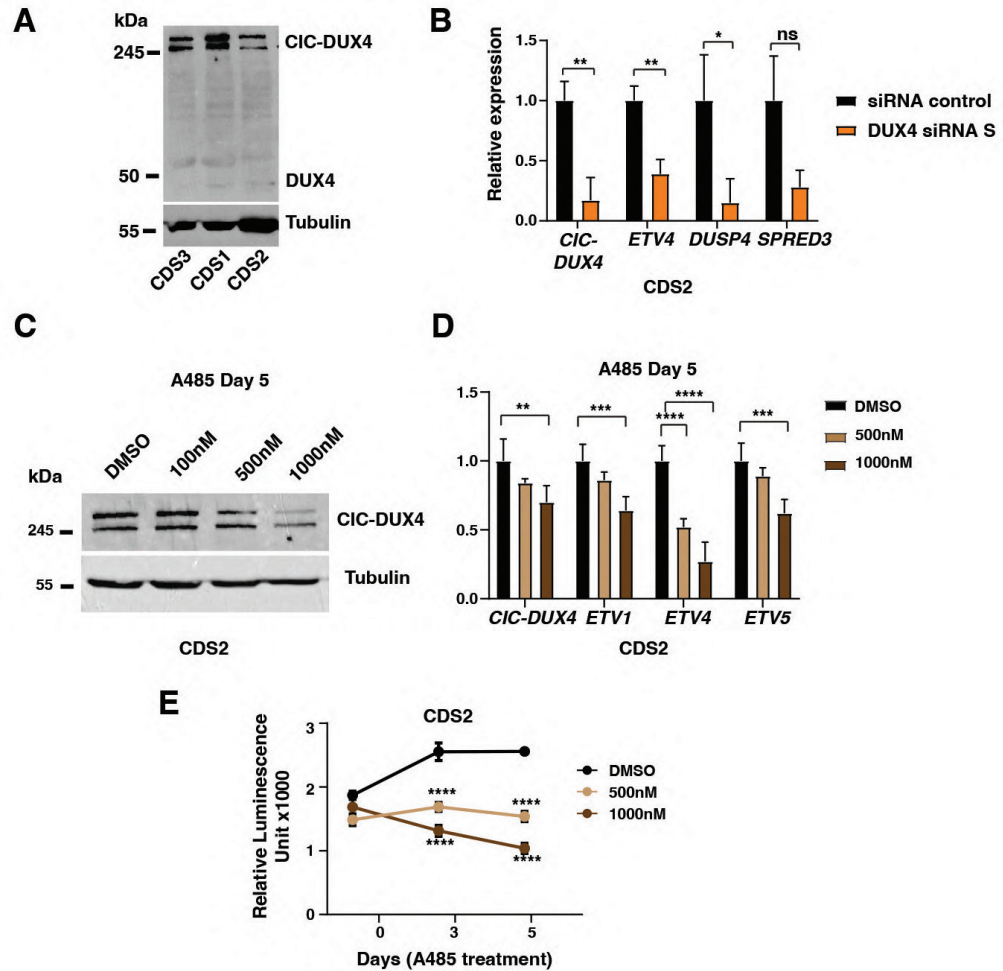

**Figure S1:** (A) Western Blot showing CIC-DUX4 as well as endogenous DUX4 protein levels across CDS1, CDS2 and CDS3 cell lines. (B) RT-qPCR analysis of the expression levels for a panel of established CIC-DUX4 target genes upon the depletion of the fusion protein in CDS2 cells. Data are presented as mean  $\pm$  SD, with n=3 per group. Gene expression levels were compared by two-way ANOVA. (C) Western Blot showing the decrease in CIC-DUX4 protein levels in CDS2 cells treated with increasing concentrations of A-485. (D) RT-qPCR analysis of the expression levels for CIC-DUX4 and a panel of fusion protein target genes in the CDS2 cell line treated with two different concentrations of A-485. Data are presented as mean  $\pm$  SD, with n=3 per group. Gene expression levels were compared by two-way ANOVA. (E) Changes in CDS1 proliferation upon treatment with increasing concentration of A-485, as assessed by luminescence. Data are presented as mean  $\pm$  SD, with n=4 per group. Statistical analyses were done using two-way ANOVA.

**Figure S2**

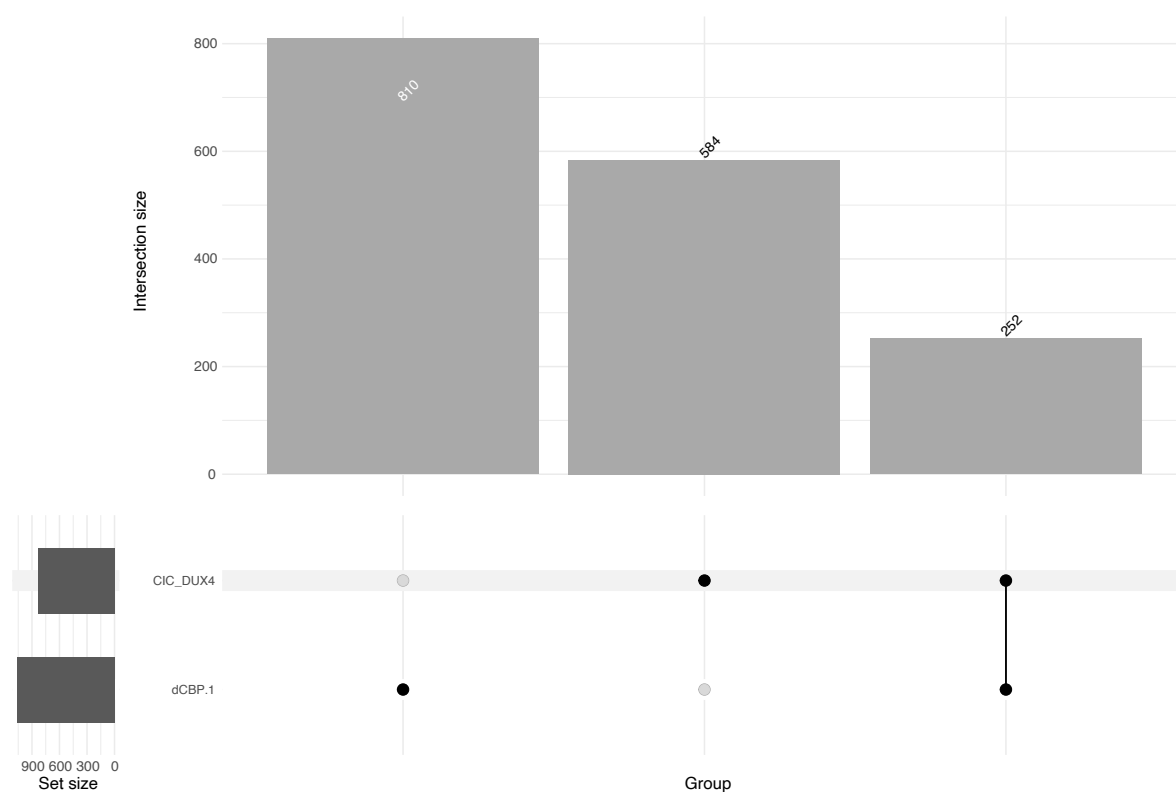

**Figure S2** :Upset plot showing the number of common downregulated genes in CDS2 following CIC-DUX4 depletion or dCBP-1 treatment and their intersection. Vertical bars show the number common genes (intersection size) from a given set of methods (bottom filled connected circles). Horizontal bars illustrate the total number of genes (set size) output from each integration method.

**Figure S3**

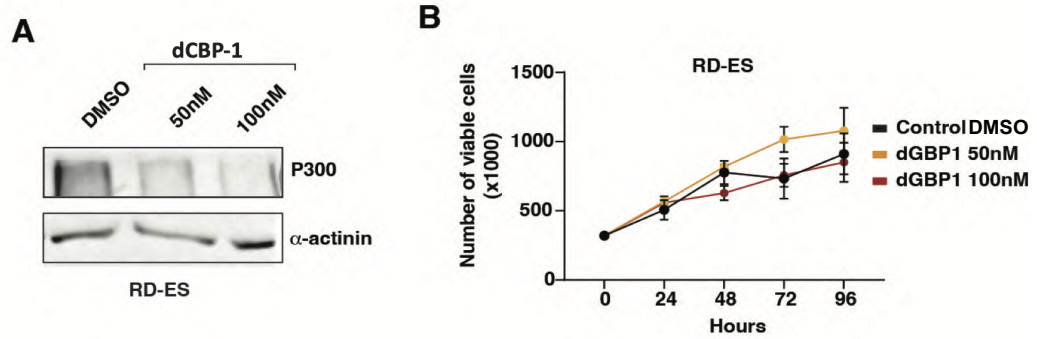

**Figure S3: (A)** Western blot showing the decrease in p300 protein levels in the RD-ES Ewing sarcoma cell line treated with increasing concentrations of the p300 protein degrader dCBP-1. **(B)** Plots depicting the lack of changes in cellular proliferation upon treatment of the RD-ES line with two different concentrations of dCBP-1, as assessed by relative luminescence. Data are presented as mean  $\pm$  SD, with n=4 per group. Statistical analyses were done using two-way ANOVA.

## Supplementary Tables 1-6

**Table S1.** PCR primers

| Gene                   | Forward primer               | Reverse primer               |
|------------------------|------------------------------|------------------------------|
| <i>GAPDH</i>           | 5'-GTCTCTCTGACTTCAACAGCG-3'  | 5'-ACCACCCTGTTGCTGTAGCCAA-3' |
| <i>TBP</i>             | 5'-CGGCTGTTTAACCTCGCTTC-3'   | 5'-CACACGCCAAGAAACAGTGA-3'   |
| <i>CIC-DUX4(CDS1)</i>  | 5'-CTCACCCAGCTCGGACTCT-3'    | 5'-ACTCCCCTGGGACGTGG-3'      |
| <i>CIC-DUX4 (CDS2)</i> | 5'-CTCACCCAGCTCGGACTCT-3'    | 5'-GGAGTGCAGACCAGG-3'        |
| <i>EP300</i>           | 5'-GCTTCAGACAAGTCTTGGCAT-3'  | 5'-ACTACCAGATCGCAGCAATTC-3'  |
| <i>ETV1</i>            | 5'-GCAAGAACGCTTCTGGC-3'      | 5'-CCTTCCCGATACATTCT-3'      |
| <i>ETV4</i>            | 5'-AGGAACAGACGGACTTCGCCTA-3' | 5'-CTGGGAATGGTCGCAGAGGTT-3'  |
| <i>ETV5</i>            | 5'-TCAGCAAGTCCCTTTATGGTC-3'  | 5'-GCTCTTCAGAATCGTGAGCCA-3'  |

**Table S2.** Primary antibodies for Western blot

| Antibodies                               | Source         | Identifier  |
|------------------------------------------|----------------|-------------|
| Rabbit polyclonal anti-DUX4 C-terminal   | Origene        | AP51343PU-N |
| Rabbit monoclonal p300 (D2X6N)           | Cell signaling | 54062       |
| Mouse monoclonal anti- $\alpha$ -actinin | Sigma-aldrich  | 05-384      |
| Mouse monoclonal anti- $\alpha$ -tubulin | Sigma-aldrich  | T6074-100UL |

**Table S3.** Antibodies for Chromatin immunoprecipitation

| Antibodies                                   | Source         | Identifier  |
|----------------------------------------------|----------------|-------------|
| Rabbit polyclonal anti-DUX4 C-terminal       | Origene        | AP51343PU-N |
| Rabbit monoclonal p300 (D2X6N)               | Cell signaling | 54062       |
| Anti-trimethyl-Histone H3 (Lys4)             | Merck          | 07-473      |
| Histone H3K27ac                              | Active Motif   | 39133       |
| Anti-Histone H3 (mono methyl K4), ChIP grade | Abcam          | ab8895      |

**Table S4.** CIC-DUX4 peaks

| Chromosome number | Genome coordinates |           | Relation to neighboring genes |
|-------------------|--------------------|-----------|-------------------------------|
| chr1              | 12689039           | 12689881  | Distal                        |
| chr1              | 41921326           | 41922608  | Distal                        |
| chr1              | 42420190           | 42422423  | Distal                        |
| chr1              | 43146903           | 43147846  | TSS                           |
| chr1              | 46268094           | 46269083  | TSS                           |
| chr1              | 51435413           | 51438760  | TSS                           |
| chr1              | 52522370           | 52524108  | TSS                           |
| chr1              | 53704332           | 53707143  | TSS                           |
| chr1              | 58870890           | 58872591  | Distal                        |
| chr1              | 58906674           | 58908865  | Distal                        |
| chr1              | 65935448           | 65938537  | Distal                        |
| chr1              | 65992044           | 65994045  | TSS                           |
| chr1              | 78443353           | 78445167  | TSS                           |
| chr1              | 78469209           | 78470440  | TSS                           |
| chr1              | 86045185           | 86046336  | TSS                           |
| chr1              | 89196766           | 89197894  | Distal                        |
| chr1              | 92149449           | 92150981  | Distal                        |
| chr1              | 92248675           | 92250890  | Distal                        |
| chr1              | 94041220           | 94042981  | Distal                        |
| chr1              | 120557180          | 120558858 | TSS                           |
| chr1              | 150207989          | 150209405 | TSS                           |
| chr1              | 150335241          | 150337010 | TSS                           |
| chr1              | 150337231          | 150339148 | TSS                           |
| chr1              | 150539465          | 150541648 | TSS                           |
| chr1              | 151042700          | 151043421 | TSS                           |
| chr1              | 151952315          | 151954319 | Distal                        |
| chr1              | 153853077          | 153854927 | TSS                           |
| chr1              | 153895592          | 153896682 | TSS                           |
| chr1              | 156570542          | 156571619 | TSS                           |
| chr1              | 160255021          | 160255268 | TSS                           |
| chr1              | 161015509          | 161016473 | TSS                           |
| chr1              | 161102644          | 161103702 | TSS                           |
| chr1              | 168434999          | 168437326 | Distal                        |

|      |           |           |        |
|------|-----------|-----------|--------|
| chr1 | 168551210 | 168552768 | Distal |
| chr1 | 172428544 | 172431474 | Distal |
| chr1 | 181068266 | 181069409 | TSS    |
| chr1 | 183805782 | 183806939 | Distal |
| chr1 | 184579985 | 184580965 | TSS    |
| chr1 | 204475496 | 204477414 | TSS    |
| chr1 | 205719317 | 205720379 | TSS    |
| chr1 | 209757074 | 209759035 | TSS    |
| chr1 | 209759272 | 209760635 | TSS    |
| chr1 | 209770647 | 209771591 | Distal |
| chr1 | 209788716 | 209790725 | Distal |
| chr1 | 209791597 | 209794239 | Distal |
| chr1 | 234736124 | 234744261 | TSS    |
| chr1 | 234859134 | 234860739 | TSS    |
| chr1 | 235461488 | 235462805 | Distal |
| chr1 | 244999185 | 245000121 | TSS    |
| chr1 | 249239829 | 249240600 | Distal |
| chr2 | 1569954   | 1571366   | Distal |
| chr2 | 1628916   | 1630464   | Distal |
| chr2 | 1655699   | 1662171   | Distal |
| chr2 | 1681525   | 1685252   | Distal |
| chr2 | 1701717   | 1705128   | Distal |
| chr2 | 1705566   | 1706572   | Distal |
| chr2 | 1709718   | 1712864   | TSS    |
| chr2 | 1718624   | 1719977   | TSS    |
| chr2 | 1720376   | 1722561   | TSS    |
| chr2 | 1724008   | 1729975   | TSS    |
| chr2 | 1730308   | 1731930   | TSS    |
| chr2 | 1732590   | 1737096   | TSS    |
| chr2 | 1740737   | 1742194   | TSS    |
| chr2 | 1742509   | 1743697   | TSS    |
| chr2 | 1745278   | 1747082   | TSS    |
| chr2 | 1748936   | 1754243   | TSS    |
| chr2 | 1754499   | 1757667   | Distal |
| chr2 | 1758604   | 1760444   | Distal |
| chr2 | 3644049   | 3645445   | TSS    |
| chr2 | 9548807   | 9549683   | Distal |
| chr2 | 12316345  | 12318460  | Distal |
| chr2 | 20101425  | 20102656  | TSS    |
| chr2 | 24296284  | 24299552  | TSS    |
| chr2 | 25351897  | 25352165  | Distal |
| chr2 | 27273417  | 27274369  | TSS    |
| chr2 | 27545585  | 27546807  | TSS    |
| chr2 | 27849149  | 27850533  | TSS    |
| chr2 | 31541726  | 31543125  | Distal |
| chr2 | 38385237  | 38386267  | Distal |
| chr2 | 43985761  | 43987438  | Distal |
| chr2 | 46561905  | 46563505  | TSS    |
| chr2 | 47417896  | 47421277  | TSS    |
| chr2 | 47496272  | 47498958  | Distal |
| chr2 | 48094241  | 48095339  | Distal |
| chr2 | 65527835  | 65530319  | Distal |
| chr2 | 65560535  | 65561094  | Distal |
| chr2 | 65576481  | 65579175  | Distal |
| chr2 | 65640458  | 65641446  | Distal |
| chr2 | 65655365  | 65657706  | TSS    |
| chr2 | 65661145  | 65662872  | TSS    |
| chr2 | 65663490  | 65665550  | TSS    |
| chr2 | 67663655  | 67665016  | Distal |
| chr2 | 88927387  | 88928046  | TSS    |
| chr2 | 98485316  | 98486465  | Distal |
| chr2 | 98750201  | 98751716  | Distal |
| chr2 | 109294530 | 109295353 | Distal |
| chr2 | 134474050 | 134477233 | Distal |
| chr2 | 149403463 | 149404168 | TSS    |
| chr2 | 179143396 | 179144604 | Distal |
| chr2 | 197789536 | 197790884 | TSS    |
| chr2 | 201753453 | 201754963 | TSS    |
| chr2 | 203130105 | 203132728 | TSS    |
| chr2 | 207997786 | 208001149 | TSS    |
| chr2 | 208575219 | 208576068 | TSS    |
| chr2 | 216979701 | 216981012 | TSS    |
| chr2 | 224588362 | 224590900 | TSS    |
| chr2 | 238623947 | 238625292 | Distal |
| chr3 | 9439954   | 9442051   | TSS    |
| chr3 | 9807973   | 9811293   | TSS    |
| chr3 | 53914692  | 53915668  | TSS    |
| chr3 | 57541167  | 57542040  | TSS    |
| chr3 | 63953431  | 63954652  | TSS    |

|      |           |           |        |
|------|-----------|-----------|--------|
| chr3 | 78880626  | 78882281  | Distal |
| chr3 | 99268061  | 99270931  | Distal |
| chr3 | 99427444  | 99440050  | Distal |
| chr3 | 99535602  | 99536948  | TSS    |
| chr3 | 101292627 | 101292865 | TSS    |
| chr3 | 101404551 | 101406135 | TSS    |
| chr3 | 115510829 | 115511696 | TSS    |
| chr3 | 122101419 | 122102720 | TSS    |
| chr3 | 122608308 | 122609862 | Distal |
| chr3 | 123304120 | 123305359 | TSS    |
| chr3 | 128597133 | 128598237 | TSS    |
| chr3 | 133163026 | 133163848 | Distal |
| chr3 | 147125039 | 147126941 | TSS    |
| chr3 | 149292776 | 149294852 | Distal |
| chr3 | 149686486 | 149687777 | TSS    |
| chr3 | 150128819 | 150133128 | TSS    |
| chr3 | 152972520 | 152976486 | Distal |
| chr3 | 159398625 | 159400762 | Distal |
| chr3 | 161607089 | 161608525 | Distal |
| chr3 | 165518483 | 165520097 | Distal |
| chr3 | 184305610 | 184309297 | Distal |
| chr3 | 185080246 | 185082052 | TSS    |
| chr3 | 185644039 | 185647027 | TSS    |
| chr3 | 185647213 | 185648902 | TSS    |
| chr3 | 185649771 | 185655147 | TSS    |
| chr3 | 185759558 | 185764329 | Distal |
| chr3 | 185764536 | 185767852 | Distal |
| chr3 | 185784225 | 185789447 | Distal |
| chr3 | 185789997 | 185794952 | Distal |
| chr3 | 185798535 | 185800154 | Distal |
| chr3 | 185800551 | 185803250 | Distal |
| chr3 | 185803827 | 185820310 | TSS    |
| chr3 | 185820471 | 185826398 | TSS    |
| chr3 | 185826983 | 185829894 | TSS    |
| chr3 | 185883335 | 185884678 | Distal |
| chr3 | 186287514 | 186288402 | TSS    |
| chr3 | 195424399 | 195428383 | TSS    |
| chr3 | 196377219 | 196378415 | Distal |
| chr3 | 196759936 | 196760966 | Distal |
| chr3 | 197160644 | 197161294 | Distal |
| chr3 | 197676176 | 197678154 | TSS    |
| chr3 | 197739160 | 197742826 | Distal |
| chr3 | 197900029 | 197900555 | Distal |
| chr4 | 1169498   | 1171450   | Distal |
| chr4 | 8413479   | 8414440   | Distal |
| chr4 | 8610294   | 8611632   | Distal |
| chr4 | 26321702  | 26322384  | TSS    |
| chr4 | 26343972  | 26344971  | Distal |
| chr4 | 40058970  | 40060338  | TSS    |
| chr4 | 40910947  | 40912193  | Distal |
| chr4 | 42459505  | 42461923  | TSS    |
| chr4 | 77502150  | 77507194  | TSS    |
| chr4 | 83820649  | 83821820  | TSS    |
| chr4 | 88340552  | 88342064  | Distal |
| chr4 | 100010038 | 100010866 | TSS    |
| chr4 | 103708500 | 103709795 | Distal |
| chr4 | 103710018 | 103714992 | Distal |
| chr4 | 140755655 | 140756870 | Distal |
| chr4 | 141728638 | 141729586 | Distal |
| chr4 | 158621752 | 158624270 | Distal |
| chr4 | 174253332 | 174254761 | TSS    |
| chr4 | 175204493 | 175206220 | TSS    |
| chr4 | 181710769 | 181712848 | Distal |
| chr4 | 189391497 | 189392765 | Distal |
| chr4 | 189970158 | 189972465 | TSS    |
| chr4 | 191043604 | 191044306 | Distal |
| chr5 | 11429     | 11875     | Distal |
| chr5 | 1456697   | 1460290   | Distal |
| chr5 | 1541357   | 1543392   | Distal |
| chr5 | 1543648   | 1544863   | Distal |
| chr5 | 4369336   | 4372230   | Distal |
| chr5 | 4547966   | 4551857   | Distal |
| chr5 | 4575300   | 4578387   | Distal |
| chr5 | 20972700  | 20975803  | TSS    |
| chr5 | 31935309  | 31937691  | TSS    |
| chr5 | 32026725  | 32028793  | Distal |
| chr5 | 33439356  | 33442714  | TSS    |
| chr5 | 41056894  | 41057921  | Distal |
| chr5 | 43066679  | 43068389  | TSS    |

|      |           |           |        |
|------|-----------|-----------|--------|
| chr5 | 76085916  | 76087388  | Distal |
| chr5 | 76507250  | 76511299  | TSS    |
| chr5 | 81692338  | 81693991  | Distal |
| chr5 | 82321936  | 82323718  | Distal |
| chr5 | 82801885  | 82806296  | Distal |
| chr5 | 89705820  | 89706562  | TSS    |
| chr5 | 90676263  | 90679121  | TSS    |
| chr5 | 112439562 | 112442898 | Distal |
| chr5 | 137513573 | 137514633 | TSS    |
| chr5 | 139510888 | 139512766 | Distal |
| chr5 | 139935493 | 139936685 | TSS    |
| chr5 | 140900601 | 140902035 | Distal |
| chr5 | 140937634 | 140938693 | TSS    |
| chr5 | 141704329 | 141705367 | TSS    |
| chr5 | 142076610 | 142078744 | TSS    |
| chr5 | 149685101 | 149686051 | Distal |
| chr5 | 162930873 | 162932445 | TSS    |
| chr5 | 172741672 | 172744122 | Distal |
| chr5 | 177632494 | 177634638 | TSS    |
| chr5 | 180670684 | 180671444 | TSS    |
| chr6 | 10395095  | 10396577  | Distal |
| chr6 | 10405769  | 10407439  | TSS    |
| chr6 | 10408558  | 10410006  | TSS    |
| chr6 | 10527918  | 10530894  | TSS    |
| chr6 | 10555046  | 10557238  | TSS    |
| chr6 | 10612526  | 10614546  | Distal |
| chr6 | 10641672  | 10644648  | Distal |
| chr6 | 12013374  | 12015146  | TSS    |
| chr6 | 16344476  | 16346794  | Distal |
| chr6 | 16412001  | 16415199  | Distal |
| chr6 | 16423238  | 16425389  | Distal |
| chr6 | 16758134  | 16760040  | TSS    |
| chr6 | 16801614  | 16805440  | TSS    |
| chr6 | 20533759  | 20535748  | TSS    |
| chr6 | 29562315  | 29563386  | Distal |
| chr6 | 29563795  | 29568395  | Distal |
| chr6 | 29592225  | 29595115  | TSS    |
| chr6 | 30582379  | 30584993  | TSS    |
| chr6 | 30686978  | 30687911  | TSS    |
| chr6 | 31508755  | 31510753  | TSS    |
| chr6 | 32937161  | 32938190  | TSS    |
| chr6 | 33238855  | 33239684  | TSS    |
| chr6 | 34855922  | 34856522  | TSS    |
| chr6 | 36562118  | 36564272  | TSS    |
| chr6 | 37211758  | 37213489  | Distal |
| chr6 | 40407793  | 40409913  | Distal |
| chr6 | 41977779  | 41978923  | Distal |
| chr6 | 42417366  | 42419836  | TSS    |
| chr6 | 42660134  | 42661323  | Distal |
| chr6 | 43594691  | 43595559  | TSS    |
| chr6 | 72674360  | 72675956  | Distal |
| chr6 | 75952864  | 75953495  | TSS    |
| chr6 | 89791610  | 89794444  | TSS    |
| chr6 | 90007037  | 90009560  | Distal |
| chr6 | 90926847  | 90929944  | TSS    |
| chr6 | 91073700  | 91075247  | Distal |
| chr6 | 99872772  | 99874558  | TSS    |
| chr6 | 112651045 | 112653788 | Distal |
| chr6 | 119493137 | 119497014 | Distal |
| chr6 | 138737360 | 138741252 | Distal |
| chr6 | 138780044 | 138783098 | Distal |
| chr6 | 138817694 | 138822877 | TSS    |
| chr6 | 138835544 | 138837847 | Distal |
| chr6 | 138842809 | 138846242 | Distal |
| chr6 | 138874801 | 138878342 | Distal |
| chr6 | 138880559 | 138882199 | Distal |
| chr6 | 138891124 | 138893107 | TSS    |
| chr6 | 138913392 | 138916837 | TSS    |
| chr6 | 139011811 | 139013189 | TSS    |
| chr6 | 146610928 | 146612996 | Distal |
| chr6 | 148841436 | 148847042 | TSS    |
| chr6 | 164497270 | 164498848 | Distal |
| chr6 | 166289425 | 166292057 | TSS    |
| chr6 | 166395776 | 166399217 | TSS    |
| chr6 | 166399451 | 166400252 | TSS    |
| chr6 | 166419708 | 166421145 | TSS    |
| chr6 | 166878846 | 166881964 | TSS    |
| chr6 | 168904786 | 168908016 | Distal |
| chr7 | 135845    | 138157    | TSS    |

|      |           |           |        |
|------|-----------|-----------|--------|
| chr7 | 8009567   | 8013264   | TSS    |
| chr7 | 13958550  | 13962532  | Distal |
| chr7 | 14017094  | 14033096  | TSS    |
| chr7 | 23506537  | 23508121  | TSS    |
| chr7 | 23509684  | 23510659  | TSS    |
| chr7 | 23511079  | 23513111  | TSS    |
| chr7 | 30633342  | 30634401  | TSS    |
| chr7 | 30634800  | 30637145  | TSS    |
| chr7 | 31022451  | 31023345  | Distal |
| chr7 | 35831948  | 35833655  | Distal |
| chr7 | 38218022  | 38219806  | TSS    |
| chr7 | 42144334  | 42146423  | Distal |
| chr7 | 42146839  | 42150659  | TSS    |
| chr7 | 51526770  | 51528749  | Distal |
| chr7 | 75340466  | 75343015  | Distal |
| chr7 | 76255379  | 76255989  | TSS    |
| chr7 | 90223890  | 90225088  | TSS    |
| chr7 | 100804590 | 100805698 | TSS    |
| chr7 | 100809059 | 100809770 | TSS    |
| chr7 | 100810215 | 100812133 | TSS    |
| chr7 | 104622798 | 104624647 | TSS    |
| chr7 | 106807646 | 106809443 | TSS    |
| chr7 | 107027142 | 107028643 | Distal |
| chr7 | 114694188 | 114696691 | TSS    |
| chr7 | 114717667 | 114721514 | TSS    |
| chr7 | 128499914 | 128501155 | Distal |
| chr7 | 129588358 | 129591123 | TSS    |
| chr7 | 138306531 | 138307063 | Distal |
| chr7 | 138791951 | 138793209 | TSS    |
| chr7 | 154708547 | 154709529 | Distal |
| chr7 | 157950763 | 157953053 | Distal |
| chr8 | 1463246   | 1467015   | TSS    |
| chr8 | 1712879   | 1714434   | TSS    |
| chr8 | 6414562   | 6420047   | TSS    |
| chr8 | 22397678  | 22399027  | Distal |
| chr8 | 22399222  | 22400303  | Distal |
| chr8 | 24811978  | 24812778  | TSS    |
| chr8 | 25370998  | 25374669  | Distal |
| chr8 | 25441054  | 25444176  | TSS    |
| chr8 | 25877574  | 25887096  | Distal |
| chr8 | 27750746  | 27754148  | Distal |
| chr8 | 27757674  | 27759687  | Distal |
| chr8 | 27840033  | 27843391  | TSS    |
| chr8 | 29197809  | 29199644  | TSS    |
| chr8 | 29200838  | 29205391  | TSS    |
| chr8 | 29208721  | 29209529  | TSS    |
| chr8 | 29663590  | 29666229  | TSS    |
| chr8 | 29742311  | 29745319  | Distal |
| chr8 | 48265800  | 48266988  | Distal |
| chr8 | 61495777  | 61496984  | Distal |
| chr8 | 61532108  | 61533252  | Distal |
| chr8 | 61708039  | 61709288  | Distal |
| chr8 | 61719315  | 61721841  | TSS    |
| chr8 | 66446834  | 66447906  | Distal |
| chr8 | 67090585  | 67092290  | TSS    |
| chr8 | 116461357 | 116465154 | TSS    |
| chr8 | 121972399 | 121973380 | Distal |
| chr8 | 125462385 | 125463380 | TSS    |
| chr8 | 125485532 | 125486815 | TSS    |
| chr8 | 128746549 | 128747781 | TSS    |
| chr8 | 129138617 | 129141148 | Distal |
| chr8 | 130563430 | 130565232 | Distal |
| chr8 | 130704142 | 130705842 | Distal |
| chr8 | 130720215 | 130723479 | Distal |
| chr8 | 135725617 | 135726950 | TSS    |
| chr8 | 140868034 | 140869676 | Distal |
| chr8 | 140875678 | 140878097 | TSS    |
| chr8 | 141473233 | 141474869 | TSS    |
| chr8 | 141517401 | 141519124 | TSS    |
| chr9 | 14207775  | 14211760  | Distal |
| chr9 | 14317529  | 14318445  | TSS    |
| chr9 | 27161092  | 27163086  | Distal |
| chr9 | 33125137  | 33126934  | Distal |
| chr9 | 35732603  | 35733467  | TSS    |
| chr9 | 73077453  | 73078555  | Distal |
| chr9 | 78750369  | 78752388  | Distal |
| chr9 | 86736778  | 86738194  | Distal |
| chr9 | 91660446  | 91678111  | Distal |
| chr9 | 91707591  | 91708721  | Distal |



|       |           |           |        |
|-------|-----------|-----------|--------|
| chr9  | 91712119  | 91717990  | Distal |
| chr9  | 91779386  | 91780685  | Distal |
| chr9  | 91789071  | 91792472  | TSS    |
| chr9  | 91793670  | 91796451  | TSS    |
| chr9  | 91926560  | 91933279  | TSS    |
| chr9  | 98980052  | 98980460  | TSS    |
| chr9  | 127420195 | 127423664 | TSS    |
| chr9  | 127424611 | 127426894 | TSS    |
| chr9  | 128776279 | 128777113 | Distal |
| chr9  | 140222124 | 140222934 | Distal |
| chr9  | 140269795 | 140270629 | Distal |
| chr9  | 140271579 | 140273767 | Distal |
| chr10 | 1074588   | 1075500   | Distal |
| chr10 | 1075692   | 1076977   | Distal |
| chr10 | 3234829   | 3236532   | Distal |
| chr10 | 4066038   | 4067634   | TSS    |
| chr10 | 4127698   | 4129401   | Distal |
| chr10 | 4492525   | 4495503   | Distal |
| chr10 | 6060466   | 6061728   | Distal |
| chr10 | 13764502  | 13765884  | Distal |
| chr10 | 18294444  | 18296030  | Distal |
| chr10 | 21808045  | 21809335  | TSS    |
| chr10 | 21813574  | 21814839  | TSS    |
| chr10 | 22012681  | 22014502  | Distal |
| chr10 | 65028071  | 65029558  | TSS    |
| chr10 | 75503191  | 75504529  | TSS    |
| chr10 | 79011462  | 79013411  | Distal |
| chr10 | 79044754  | 79048401  | Distal |
| chr10 | 79049045  | 79051008  | Distal |
| chr10 | 82299577  | 82302812  | TSS    |
| chr10 | 98160392  | 98162279  | Distal |
| chr10 | 99213719  | 99214507  | Distal |
| chr10 | 99599178  | 99600786  | Distal |
| chr10 | 102045423 | 102046122 | TSS    |
| chr10 | 104004719 | 104006281 | TSS    |
| chr10 | 104040083 | 104041062 | TSS    |
| chr10 | 111724942 | 111725868 | TSS    |
| chr10 | 111726335 | 111727882 | TSS    |
| chr10 | 115613032 | 115614558 | TSS    |
| chr11 | 1022449   | 1023723   | Distal |
| chr11 | 1964786   | 1965815   | Distal |
| chr11 | 2958740   | 2960430   | Distal |
| chr11 | 2965184   | 2965669   | Distal |
| chr11 | 2966303   | 2967864   | Distal |
| chr11 | 3373462   | 3379170   | Distal |
| chr11 | 7911510   | 7913776   | Distal |
| chr11 | 22761669  | 22765518  | Distal |
| chr11 | 27315343  | 27317945  | Distal |
| chr11 | 32467396  | 32469312  | Distal |
| chr11 | 33100109  | 33101478  | Distal |
| chr11 | 33280167  | 33280885  | TSS    |
| chr11 | 33673910  | 33675132  | Distal |
| chr11 | 34363154  | 34364328  | Distal |
| chr11 | 35269633  | 35271280  | Distal |
| chr11 | 36764640  | 36766678  | Distal |
| chr11 | 43574941  | 43578107  | TSS    |
| chr11 | 43702685  | 43703986  | TSS    |
| chr11 | 46299953  | 46303851  | TSS    |
| chr11 | 46344468  | 46347764  | Distal |
| chr11 | 46638077  | 46640787  | TSS    |
| chr11 | 47560203  | 47560833  | TSS    |
| chr11 | 47789074  | 47790174  | TSS    |
| chr11 | 57412174  | 57414442  | TSS    |
| chr11 | 57414780  | 57417233  | TSS    |
| chr11 | 57417537  | 57421313  | TSS    |
| chr11 | 58689910  | 58691260  | Distal |
| chr11 | 62607130  | 62609477  | TSS    |
| chr11 | 65192392  | 65195480  | TSS    |
| chr11 | 65265883  | 65274193  | TSS    |
| chr11 | 67007996  | 67009044  | TSS    |
| chr11 | 69065111  | 69067043  | TSS    |
| chr11 | 70806290  | 70808332  | Distal |
| chr11 | 74970655  | 74974120  | Distal |
| chr11 | 76154795  | 76156284  | TSS    |
| chr11 | 77600674  | 77602776  | Distal |
| chr11 | 94526588  | 94528523  | TSS    |
| chr11 | 95523673  | 95525403  | TSS    |
| chr11 | 115227247 | 115229099 | Distal |
| chr11 | 117979930 | 117981028 | Distal |

|       |           |           |        |
|-------|-----------|-----------|--------|
| chr11 | 118276938 | 118278177 | Distal |
| chr11 | 122602970 | 122605382 | Distal |
| chr11 | 122933748 | 122934948 | TSS    |
| chr11 | 125037403 | 125040762 | TSS    |
| chr11 | 125048534 | 125053004 | Distal |
| chr11 | 125216045 | 125216666 | Distal |
| chr11 | 125495882 | 125496739 | TSS    |
| chr11 | 126099689 | 126102552 | Distal |
| chr11 | 128062618 | 128066209 | Distal |
| chr11 | 128104587 | 128106819 | Distal |
| chr11 | 128158569 | 128161746 | TSS    |
| chr11 | 128262998 | 128266455 | Distal |
| chr11 | 128316440 | 128318211 | Distal |
| chr11 | 128318422 | 128321307 | Distal |
| chr11 | 128321738 | 128331863 | Distal |
| chr11 | 128332504 | 128342770 | Distal |
| chr11 | 128342935 | 128345452 | Distal |
| chr11 | 128360810 | 128391610 | TSS    |
| chr11 | 128392574 | 128395929 | TSS    |
| chr11 | 128413179 | 128416452 | TSS    |
| chr11 | 128419395 | 128424760 | TSS    |
| chr12 | 95320     | 95799     | Distal |
| chr12 | 863462    | 866397    | TSS    |
| chr12 | 2364890   | 2365298   | Distal |
| chr12 | 4223981   | 4228726   | TSS    |
| chr12 | 4242758   | 4244716   | Distal |
| chr12 | 4244898   | 4246531   | Distal |
| chr12 | 4384868   | 4387017   | TSS    |
| chr12 | 4396322   | 4397375   | Distal |
| chr12 | 4401106   | 4403177   | Distal |
| chr12 | 4413194   | 4414828   | Distal |
| chr12 | 4415839   | 4416991   | Distal |
| chr12 | 4647010   | 4648490   | TSS    |
| chr12 | 7052465   | 7053813   | TSS    |
| chr12 | 8057604   | 8059081   | Distal |
| chr12 | 8090377   | 8091212   | Distal |
| chr12 | 8233720   | 8235887   | TSS    |
| chr12 | 10873443  | 10875093  | TSS    |
| chr12 | 12657754  | 12660346  | TSS    |
| chr12 | 12867457  | 12869559  | TSS    |
| chr12 | 12871148  | 12876600  | TSS    |
| chr12 | 13317915  | 13319117  | Distal |
| chr12 | 14795402  | 14797668  | Distal |
| chr12 | 26081197  | 26082875  | Distal |
| chr12 | 49462455  | 49463424  | TSS    |
| chr12 | 52279724  | 52280769  | Distal |
| chr12 | 53873627  | 53876474  | Distal |
| chr12 | 53876998  | 53879691  | Distal |
| chr12 | 54672395  | 54675814  | TSS    |
| chr12 | 56390346  | 56391385  | TSS    |
| chr12 | 56509636  | 56511267  | TSS    |
| chr12 | 56552068  | 56554955  | TSS    |
| chr12 | 57106293  | 57111197  | Distal |
| chr12 | 57117253  | 57120021  | TSS    |
| chr12 | 58138146  | 58139858  | TSS    |
| chr12 | 64798851  | 64799620  | TSS    |
| chr12 | 65720690  | 65722842  | Distal |
| chr12 | 65903011  | 65906357  | Distal |
| chr12 | 65996549  | 65998696  | TSS    |
| chr12 | 66220194  | 66224814  | TSS    |
| chr12 | 66225967  | 66227049  | Distal |
| chr12 | 66228595  | 66229870  | Distal |
| chr12 | 66234427  | 66235746  | Distal |
| chr12 | 66239464  | 66241521  | Distal |
| chr12 | 66270626  | 66271468  | TSS    |
| chr12 | 66271784  | 66277539  | TSS    |
| chr12 | 66284986  | 66288397  | TSS    |
| chr12 | 66292925  | 66294305  | Distal |
| chr12 | 66323565  | 66325488  | Distal |
| chr12 | 66326634  | 66332272  | Distal |
| chr12 | 66333625  | 66338295  | Distal |
| chr12 | 66338989  | 66344864  | Distal |
| chr12 | 66347075  | 66348358  | Distal |
| chr12 | 66349080  | 66350731  | Distal |
| chr12 | 66354932  | 66357048  | Distal |
| chr12 | 66358702  | 66366755  | Distal |
| chr12 | 68099344  | 68100057  | Distal |
| chr12 | 89743207  | 89745198  | TSS    |
| chr12 | 89745926  | 89747123  | TSS    |

|       |           |           |        |
|-------|-----------|-----------|--------|
| chr12 | 105802359 | 105804723 | Distal |
| chr12 | 108997794 | 109000827 | Distal |
| chr12 | 111298468 | 111299910 | Distal |
| chr12 | 120729229 | 120731352 | TSS    |
| chr12 | 122239357 | 122240870 | TSS    |
| chr12 | 123010749 | 123012540 | TSS    |
| chr12 | 123942259 | 123943352 | TSS    |
| chr12 | 125399849 | 125403059 | TSS    |
| chr12 | 125411754 | 125412886 | TSS    |
| chr12 | 125422103 | 125425402 | TSS    |
| chr12 | 129192702 | 129193811 | TSS    |
| chr12 | 132172368 | 132174964 | Distal |
| chr12 | 132478838 | 132481804 | Distal |
| chr12 | 132873643 | 132877401 | Distal |
| chr12 | 133188003 | 133190272 | TSS    |
| chr12 | 133190650 | 133194882 | TSS    |
| chr12 | 133219199 | 133221360 | Distal |
| chr12 | 133221847 | 133222979 | Distal |
| chr12 | 133249043 | 133249783 | Distal |
| chr12 | 133255091 | 133257857 | Distal |
| chr12 | 133258917 | 133263350 | TSS    |
| chr12 | 133265917 | 133287091 | TSS    |
| chr12 | 133288065 | 133293599 | TSS    |
| chr13 | 30130657  | 30131884  | Distal |
| chr13 | 30607684  | 30608830  | Distal |
| chr13 | 33924965  | 33926545  | TSS    |
| chr13 | 37573624  | 37576427  | TSS    |
| chr13 | 37632390  | 37633569  | TSS    |
| chr13 | 39771165  | 39772344  | Distal |
| chr13 | 40110419  | 40111707  | Distal |
| chr13 | 50017268  | 50018126  | TSS    |
| chr13 | 53225887  | 53226781  | TSS    |
| chr13 | 77902360  | 77904645  | TSS    |
| chr13 | 80932256  | 80936432  | Distal |
| chr13 | 81009789  | 81012365  | Distal |
| chr13 | 93961085  | 93964024  | TSS    |
| chr13 | 98796381  | 98798314  | TSS    |
| chr13 | 110352210 | 110353558 | Distal |
| chr13 | 110428988 | 110431330 | TSS    |
| chr13 | 110699644 | 110700910 | Distal |
| chr13 | 114553720 | 114554718 | Distal |
| chr14 | 21561658  | 21562716  | TSS    |
| chr14 | 21670280  | 21672253  | Distal |
| chr14 | 21735426  | 21737573  | TSS    |
| chr14 | 23789480  | 23790374  | TSS    |
| chr14 | 23987569  | 23989193  | Distal |
| chr14 | 24701706  | 24703685  | TSS    |
| chr14 | 35449850  | 35451651  | TSS    |
| chr14 | 35589801  | 35593317  | TSS    |
| chr14 | 50412170  | 50414178  | Distal |
| chr14 | 58763357  | 58764999  | TSS    |
| chr14 | 58893881  | 58897755  | TSS    |
| chr14 | 63670187  | 63672757  | TSS    |
| chr14 | 63761127  | 63763073  | TSS    |
| chr14 | 75229264  | 75229894  | TSS    |
| chr14 | 75232107  | 75232804  | TSS    |
| chr14 | 75746022  | 75747994  | TSS    |
| chr14 | 89793315  | 89795893  | Distal |
| chr14 | 89805562  | 89807943  | Distal |
| chr14 | 89894301  | 89897574  | TSS    |
| chr14 | 89908669  | 89910244  | Distal |
| chr14 | 102276146 | 102277319 | TSS    |
| chr15 | 30917703  | 30918236  | TSS    |
| chr15 | 38545461  | 38550458  | TSS    |
| chr15 | 40737496  | 40738705  | TSS    |
| chr15 | 49201961  | 49203859  | Distal |
| chr15 | 49255616  | 49257361  | TSS    |
| chr15 | 52943827  | 52945993  | TSS    |
| chr15 | 64993388  | 64994614  | TSS    |
| chr15 | 66661166  | 66662736  | TSS    |
| chr15 | 69743674  | 69745040  | TSS    |
| chr15 | 73988767  | 73989880  | Distal |
| chr15 | 75015972  | 75016434  | TSS    |
| chr15 | 77779494  | 77780620  | Distal |
| chr15 | 89740577  | 89741325  | Distal |
| chr15 | 93424775  | 93425747  | TSS    |
| chr15 | 93443030  | 93447453  | TSS    |
| chr15 | 99341862  | 99345017  | TSS    |
| chr15 | 100257097 | 100261888 | TSS    |

|       |           |           |        |
|-------|-----------|-----------|--------|
| chr15 | 101441029 | 101444799 | Distal |
| chr15 | 101727675 | 101729196 | TSS    |
| chr16 | 635537    | 638551    | TSS    |
| chr16 | 895479    | 897736    | Distal |
| chr16 | 4460141   | 4461215   | Distal |
| chr16 | 15110053  | 15111644  | Distal |
| chr16 | 15360671  | 15362170  | Distal |
| chr16 | 18800046  | 18801167  | TSS    |
| chr16 | 19117117  | 19118205  | Distal |
| chr16 | 21564388  | 21565566  | Distal |
| chr16 | 22738365  | 22740940  | Distal |
| chr16 | 23142817  | 23144651  | Distal |
| chr16 | 23222376  | 23223607  | Distal |
| chr16 | 23234897  | 23237966  | Distal |
| chr16 | 23323359  | 23325529  | Distal |
| chr16 | 23389801  | 23391378  | Distal |
| chr16 | 24551646  | 24553786  | TSS    |
| chr16 | 26037594  | 26039223  | Distal |
| chr16 | 30886822  | 30887992  | TSS    |
| chr16 | 30968193  | 30969077  | TSS    |
| chr16 | 31463104  | 31464217  | Distal |
| chr16 | 31725050  | 31725573  | TSS    |
| chr16 | 49788297  | 49790309  | TSS    |
| chr16 | 49790627  | 49791709  | TSS    |
| chr16 | 49792704  | 49793921  | Distal |
| chr16 | 49794264  | 49796163  | Distal |
| chr16 | 49878036  | 49879325  | Distal |
| chr16 | 49883354  | 49888314  | TSS    |
| chr16 | 52845956  | 52848114  | Distal |
| chr16 | 53113166  | 53115328  | TSS    |
| chr16 | 53123790  | 53126533  | TSS    |
| chr16 | 53241887  | 53243983  | TSS    |
| chr16 | 57333334  | 57334557  | TSS    |
| chr16 | 65035404  | 65036877  | Distal |
| chr16 | 67062141  | 67062696  | TSS    |
| chr16 | 69444047  | 69444769  | Distal |
| chr16 | 70461810  | 70463260  | TSS    |
| chr16 | 70557676  | 70558656  | TSS    |
| chr16 | 70610267  | 70611151  | Distal |
| chr16 | 75467522  | 75468769  | TSS    |
| chr16 | 81521228  | 81524099  | Distal |
| chr16 | 85159119  | 85159744  | Distal |
| chr16 | 85159898  | 85161310  | Distal |
| chr16 | 85182205  | 85183211  | Distal |
| chr16 | 85205912  | 85208756  | TSS    |
| chr16 | 85237186  | 85240238  | TSS    |
| chr16 | 85713370  | 85715506  | Distal |
| chr16 | 87326864  | 87329343  | TSS    |
| chr16 | 87402765  | 87403755  | TSS    |
| chr16 | 87421487  | 87422032  | TSS    |
| chr16 | 89766313  | 89766730  | TSS    |
| chr17 | 643093    | 644906    | Distal |
| chr17 | 900896    | 902520    | TSS    |
| chr17 | 903672    | 904913    | Distal |
| chr17 | 2025917   | 2027607   | TSS    |
| chr17 | 4703800   | 4704520   | Distal |
| chr17 | 4811564   | 4812485   | TSS    |
| chr17 | 4849553   | 4850716   | TSS    |
| chr17 | 4870350   | 4871111   | TSS    |
| chr17 | 5795997   | 5801307   | Distal |
| chr17 | 7123732   | 7124619   | TSS    |
| chr17 | 7209983   | 7210711   | TSS    |
| chr17 | 7487174   | 7487946   | TSS    |
| chr17 | 7740005   | 7741129   | TSS    |
| chr17 | 7759758   | 7760447   | TSS    |
| chr17 | 7760628   | 7761881   | TSS    |
| chr17 | 7783857   | 7787710   | TSS    |
| chr17 | 7789701   | 7790884   | TSS    |
| chr17 | 7791201   | 7793583   | TSS    |
| chr17 | 8076491   | 8077376   | TSS    |
| chr17 | 8089736   | 8091721   | TSS    |
| chr17 | 8262226   | 8264767   | TSS    |
| chr17 | 8760037   | 8763143   | Distal |
| chr17 | 17629234  | 17630502  | TSS    |
| chr17 | 19091257  | 19091633  | TSS    |
| chr17 | 28443529  | 28444717  | TSS    |
| chr17 | 33090194  | 33092360  | Distal |
| chr17 | 34100599  | 34102088  | TSS    |
| chr17 | 36956393  | 36957045  | TSS    |

|       |          |          |        |
|-------|----------|----------|--------|
| chr17 | 38601077 | 38601850 | TSS    |
| chr17 | 38802985 | 38804327 | TSS    |
| chr17 | 40927365 | 40928829 | Distal |
| chr17 | 40948735 | 40950671 | TSS    |
| chr17 | 41321911 | 41323076 | TSS    |
| chr17 | 41437470 | 41439048 | TSS    |
| chr17 | 41600547 | 41605509 | Distal |
| chr17 | 41607377 | 41614745 | TSS    |
| chr17 | 41615121 | 41617467 | TSS    |
| chr17 | 41617698 | 41622815 | TSS    |
| chr17 | 41623739 | 41625425 | TSS    |
| chr17 | 42214807 | 42216547 | Distal |
| chr17 | 43225182 | 43225583 | TSS    |
| chr17 | 43225820 | 43226610 | TSS    |
| chr17 | 43237322 | 43238274 | TSS    |
| chr17 | 48507272 | 48510482 | TSS    |
| chr17 | 48944513 | 48946373 | TSS    |
| chr17 | 56070838 | 56072002 | Distal |
| chr17 | 56158365 | 56159638 | TSS    |
| chr17 | 57231684 | 57232782 | TSS    |
| chr17 | 57863824 | 57864580 | TSS    |
| chr17 | 57914486 | 57918921 | TSS    |
| chr17 | 63213571 | 63215001 | Distal |
| chr17 | 65557653 | 65559157 | Distal |
| chr17 | 74015285 | 74016779 | Distal |
| chr18 | 9942     | 10318    | Distal |
| chr18 | 3453780  | 3454824  | TSS    |
| chr18 | 3593000  | 3596160  | TSS    |
| chr18 | 3602694  | 3604956  | TSS    |
| chr18 | 4643625  | 4646530  | Distal |
| chr18 | 45084133 | 45085231 | TSS    |
| chr18 | 55447144 | 55448720 | Distal |
| chr18 | 60524660 | 60525533 | Distal |
| chr18 | 70322401 | 70325451 | Distal |
| chr18 | 73946076 | 73947419 | TSS    |
| chr19 | 402241   | 403747   | TSS    |
| chr19 | 1997538  | 1998719  | Distal |
| chr19 | 2003541  | 2005501  | Distal |
| chr19 | 2005864  | 2010272  | Distal |
| chr19 | 2145691  | 2146544  | Distal |
| chr19 | 4035553  | 4036975  | Distal |
| chr19 | 4246961  | 4247311  | TSS    |
| chr19 | 8654725  | 8656731  | TSS    |
| chr19 | 8657920  | 8660456  | TSS    |
| chr19 | 8661541  | 8662692  | Distal |
| chr19 | 8663644  | 8665294  | Distal |
| chr19 | 8665963  | 8668057  | Distal |
| chr19 | 8780868  | 8783474  | Distal |
| chr19 | 8783653  | 8786665  | Distal |
| chr19 | 8792055  | 8793640  | Distal |
| chr19 | 9731608  | 9733400  | TSS    |
| chr19 | 9982358  | 9983937  | Distal |
| chr19 | 10081467 | 10083390 | Distal |
| chr19 | 10765981 | 10767477 | TSS    |
| chr19 | 12833436 | 12835091 | TSS    |
| chr19 | 13894028 | 13894557 | Distal |
| chr19 | 13907088 | 13908213 | TSS    |
| chr19 | 15333462 | 15334243 | TSS    |
| chr19 | 15441073 | 15442222 | TSS    |
| chr19 | 38878795 | 38879246 | TSS    |
| chr19 | 38879572 | 38880932 | TSS    |
| chr19 | 38881492 | 38885198 | TSS    |
| chr19 | 38886807 | 38893575 | TSS    |
| chr19 | 39183752 | 39184705 | Distal |
| chr19 | 41768997 | 41770261 | TSS    |
| chr19 | 41814100 | 41817146 | TSS    |
| chr19 | 41830091 | 41831043 | TSS    |
| chr19 | 41833966 | 41835133 | TSS    |
| chr19 | 42413998 | 42416664 | Distal |
| chr19 | 45379777 | 45381237 | Distal |
| chr19 | 45393088 | 45393901 | TSS    |
| chr19 | 45594929 | 45596393 | TSS    |
| chr19 | 45596819 | 45598213 | TSS    |
| chr19 | 49160003 | 49160826 | Distal |
| chr19 | 50316360 | 50317326 | TSS    |
| chr19 | 52208248 | 52216385 | TSS    |
| chr19 | 52552215 | 52552870 | TSS    |
| chr19 | 58237849 | 58240496 | TSS    |
| chr20 | 1841277  | 1843372  | Distal |

|       |           |           |        |
|-------|-----------|-----------|--------|
| chr20 | 1864984   | 1866210   | Distal |
| chr20 | 2451227   | 2451884   | TSS    |
| chr20 | 4492516   | 4495848   | Distal |
| chr20 | 17949975  | 17951048  | TSS    |
| chr20 | 30160146  | 30160770  | TSS    |
| chr20 | 30191565  | 30192908  | TSS    |
| chr20 | 35484390  | 35485774  | Distal |
| chr20 | 39631340  | 39632529  | Distal |
| chr20 | 39658513  | 39659906  | TSS    |
| chr20 | 46270952  | 46272703  | Distal |
| chr20 | 47895154  | 47895814  | TSS    |
| chr20 | 52193138  | 52194310  | TSS    |
| chr20 | 52194677  | 52197961  | TSS    |
| chr20 | 52204946  | 52207025  | TSS    |
| chr20 | 52237662  | 52240973  | TSS    |
| chr20 | 52353344  | 52357737  | TSS    |
| chr20 | 52367220  | 52370353  | TSS    |
| chr20 | 52405885  | 52408341  | Distal |
| chr20 | 52481314  | 52484603  | TSS    |
| chr20 | 52515036  | 52517763  | Distal |
| chr20 | 52555806  | 52558582  | TSS    |
| chr20 | 59816058  | 59819962  | Distal |
| chr20 | 59823441  | 59827026  | TSS    |
| chr20 | 59829039  | 59833275  | TSS    |
| chr20 | 59833430  | 59850207  | TSS    |
| chr20 | 59850378  | 59858007  | Distal |
| chr20 | 59865292  | 59870704  | Distal |
| chr20 | 59871803  | 59875255  | Distal |
| chr20 | 59906823  | 59925047  | Distal |
| chr20 | 59961778  | 59963300  | TSS    |
| chr20 | 59963467  | 59974143  | Distal |
| chr20 | 59976016  | 59979184  | Distal |
| chr20 | 59998111  | 60000195  | Distal |
| chr20 | 60000835  | 60004638  | Distal |
| chr20 | 60357403  | 60358807  | Distal |
| chr20 | 60362653  | 60366676  | Distal |
| chr20 | 60432902  | 60434706  | Distal |
| chr20 | 60440233  | 60441741  | Distal |
| chr20 | 60523896  | 60524531  | Distal |
| chr20 | 60529573  | 60532754  | TSS    |
| chr20 | 61970629  | 61972138  | Distal |
| chr21 | 27540564  | 27541817  | TSS    |
| chr21 | 33471373  | 33472752  | Distal |
| chr21 | 33893293  | 33895015  | Distal |
| chr21 | 34852648  | 34853409  | TSS    |
| chr21 | 34914533  | 34918283  | TSS    |
| chr21 | 43768620  | 43770104  | Distal |
| chr21 | 44250745  | 44252288  | Distal |
| chr21 | 44252465  | 44255099  | Distal |
| chr21 | 44343874  | 44345054  | TSS    |
| chr21 | 44841846  | 44845774  | TSS    |
| chr21 | 45631294  | 45633383  | TSS    |
| chr22 | 18243015  | 18244174  | Distal |
| chr22 | 19982285  | 19983207  | Distal |
| chr22 | 22005119  | 22006461  | TSS    |
| chr22 | 25289700  | 25291620  | Distal |
| chr22 | 25480754  | 25483096  | Distal |
| chr22 | 38093012  | 38093683  | TSS    |
| chr22 | 39100606  | 39101774  | TSS    |
| chr22 | 43011016  | 43011982  | TSS    |
| chr22 | 45819130  | 45820618  | Distal |
| chr22 | 46961090  | 46965063  | Distal |
| chr22 | 49975584  | 49976363  | Distal |
| chrX  | 41192827  | 41193777  | TSS    |
| chrX  | 54555955  | 54556470  | TSS    |
| chrX  | 116225419 | 116231040 | Distal |

**Table S5.** CIC-DUX4 direct target genes

|           |           |          |
|-----------|-----------|----------|
| ACAD9     | ANGPT2    | BLOC1S2  |
| ACADVL    | ANKS1A    | BRD2     |
| ACTR8     | ANP32E    | BRD8     |
| ADAMTS10  | ARHGAP11B | BTF3L4   |
| ADH5      | ARID4A    | C12orf4  |
| AGBL5     | ARRDC3    | C12orf57 |
| AGBL5-AS1 | ATG13     | CAB39L   |
| ALG5      | ATXN7     | CAMK1    |

CAMK1G  
CASC11  
CBFB  
CBX5  
CCDC58  
CCDC94  
CCDC97  
CCNYL1  
CDH4  
CDK14  
CDKAL1  
CDKN1B  
CDKN2C  
CEP44  
CEP57  
CETN3  
CFDP1  
CHD2  
CHD3  
CHEK1  
CKS2  
CMSS1  
CNTD1  
COA3  
COG4  
COX20  
COX7A2  
CREB3  
CREB3L1  
CRH  
CYB5D1  
CYR61  
DCLRE1A  
DDX39B  
DDX39B-AS1  
DDX3X  
DEDD  
DLG4  
DLGAP1-AS1  
DLGAP1-AS2  
DNAJB11  
DNAJB4  
DUSP4  
DUSP6  
EIF2AK3  
EIF5A  
EPC2  
ERVH48-1  
ETS1  
ETV1  
ETV4  
ETV5  
EXOSC8  
FAM162A  
FAM214A  
FAM228B  
FAM76B  
FAM98C  
FBXO8  
FGF1  
FNBP4  
FOS  
FUBP1  
FUZ  
GABBR1  
GABPB2  
GARS  
GART  
GATAD2B  
GBF1  
GCNT2  
GGN  
GMPR2  
GNL3L  
GPATCH4  
GPN1  
GTPBP1  
GTPBP2  
HARBI1

HBP1  
HEXIM1  
HEXIM2  
HIPK3  
HIVEP1  
HM13-AS1  
HMGB2  
HNRNPA1  
HNRNPA1P10  
HNRNPAB  
HNRNPC  
HNRNPUL1  
HSD17B12  
HSPA8  
ID1  
IGF2BP3  
IQCG  
JMJD1C  
KDM2A  
KIAA0391  
KIAA0586  
KIF20A  
KLF7  
KNTC1  
LEPR  
LRCOL1  
MAGOH  
MALAT1  
MAP3K13  
MAST2  
MAT2B  
MGME1  
MIR1257  
MIR181A2HG  
MIR21  
MIR301B  
MIR3153  
MIR3175  
MIR3184  
MIR423  
MIR4279  
MIR4519  
MIR5188  
MIR570  
MPDU1  
MPV17  
MRPS18B  
MYC  
MYL6  
MYLK-AS1  
N4BP2  
NAA38  
NACA  
NBR1  
NECAP1  
NEDD8  
NEDD8-MDP1  
NHLRC2  
NHSL1  
NIF3L1  
NOP58  
NSRP1  
NUCKS1  
OAZ2  
P2RX2  
PABPN1  
PCNP  
PDE12  
PDE8B  
PEX19  
PFN2  
PGAM5  
PGAP1  
PIP4K2B  
PNISR  
POLDIP3  
POLE  
POMZP3  
PPIL3

PPP1R10  
PPP1R37  
PPP2R3C  
PPP2R5C  
PRR11  
PXDN  
PXMP2  
RAB40C  
RAD51AP1  
RBBP6  
RBPJ  
RHEBL1  
RHOJ  
RNF139  
RNF139-AS1  
RNU12  
RPL24  
RPL35A  
RPL41  
RPLP1  
RPRD2  
RPS15A  
RPS18  
RPS6KA2-IT1  
RPSAP52  
RSRC2  
SEC24C  
SEC31A  
SECISBP2  
SETD1A  
SETD5  
SETDB2  
SF3B3  
SH2D4B  
SHC3  
SHC4  
SKA2  
SKIDA1  
SMARCE1  
SNORD12C  
SNORD84  
SNORD95  
SNRNP35  
SNRNPB  
SNX5  
SON  
SPAG7  
SPRED1  
SPRED3  
SPRY4  
SRA1  
SRP54  
SRSF3  
STARD3NL  
SUGT1  
SUOX  
SUPT20H  
TAF11  
TARS  
TBCCD1  
TGIF1  
THAP9  
THAP9-AS1  
TIMM22  
TIMM9  
TLN1  
TMEM50B  
TNPO2  
TOB1  
TOB1-AS1  
TOMM40  
TRA2B  
TRERF1  
TRIOBP  
TRMT12  
TSPAN31  
TTC32  
TUBB  
TXNDC12

UBC  
USF1  
VGF  
VPS52  
WDR74  
XPOT  
YBX1  
YBX3

YLPM1  
YPEL4  
ZC3H10  
ZFAS1  
ZFAT  
ZIC1  
ZIC4  
ZNF432

ZNF561  
ZNF671  
ZNF720  
ZNFX1  
ZSWIM4

**Table S6.** Clinicopathological information of primary CIC-DUX4 frozen samples

| Sample name | Age at diagnosis | Gender | Tumor location | Tumor size | Metastasis |
|-------------|------------------|--------|----------------|------------|------------|
| CIC1        | 29               | F      | thigh          | 3.7 cm     | No         |
| CIC2        | 66               | M      | neck           | 6.1 cm     | No         |
| CIC3        | 25               | F      | thigh          | 7.5 cm     | lungs      |
